# Psychiatric Services

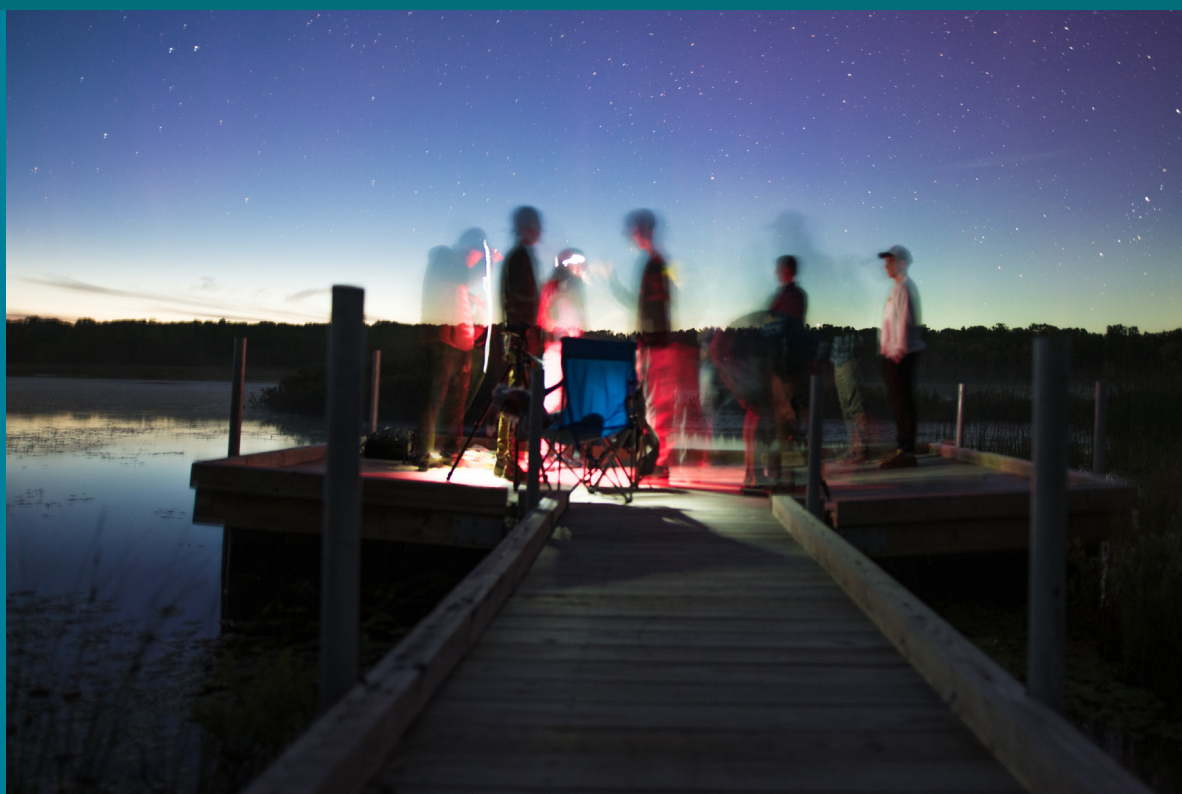

Youths in crisis: two reports

Use of telepsychiatry in the United States, 2010–2017

Holding insurers accountable for mental health treatment parity

SETUP: psychiatric hospitalization as a catalyst for recovery

AMERICAN  
**PSYCHIATRIC**  
ASSOCIATION

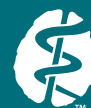

[ps.psychiatryonline.org](http://ps.psychiatryonline.org)
