# The DSM-5 Collection

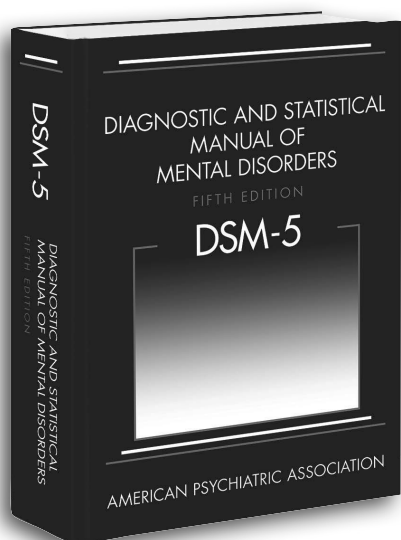

## Diagnostic and Statistical Manual of Mental Disorders, Fifth Edition (DSM-5®)

American Psychiatric Association

This new edition of *Diagnostic and Statistical Manual of Mental Disorders (DSM-5®)*, used by clinicians and researchers to diagnose and classify mental disorders, is the product of more than 10 years of effort by hundreds of international experts in all aspects of mental health. Their dedication and hard work have yielded an authoritative volume that defines and classifies mental disorders in order to improve diagnosis, treatment, and research.

The criteria are concise and explicit, intended to facilitate an objective assessment of symptom presentations in a variety of clinical settings—inpatient, outpatient, partial hospital, consultation-liaison, clinical, private practice, and primary care.

- The latest findings in neuroimaging and genetics have been integrated into each disorder along with gender and cultural considerations.
- The revised organizational structure recognizes symptoms that span multiple diagnostic categories, providing new clinical insights in diagnosis.

- Both ICD-9-CM and ICD-10-CM codes are included for each disorder.

The *Diagnostic and Statistical Manual of Mental Disorders, Fifth Edition*, is the most comprehensive, current, and critical resource for clinical practice available to today's mental health professionals.

2013 • 991 pages • ISBN 978-0-89042-554-1 • Hardcover • \$210.00 • Item #2554

2013 • 991 pages • ISBN 978-0-89042-555-8 • Paperback • \$160.00 • Item #2555

2013 • 991 pages • ISBN 978-0-89042-557-2 • eBook • \$128.00 • Item #2557

**DSM-5**  
COLLECTION

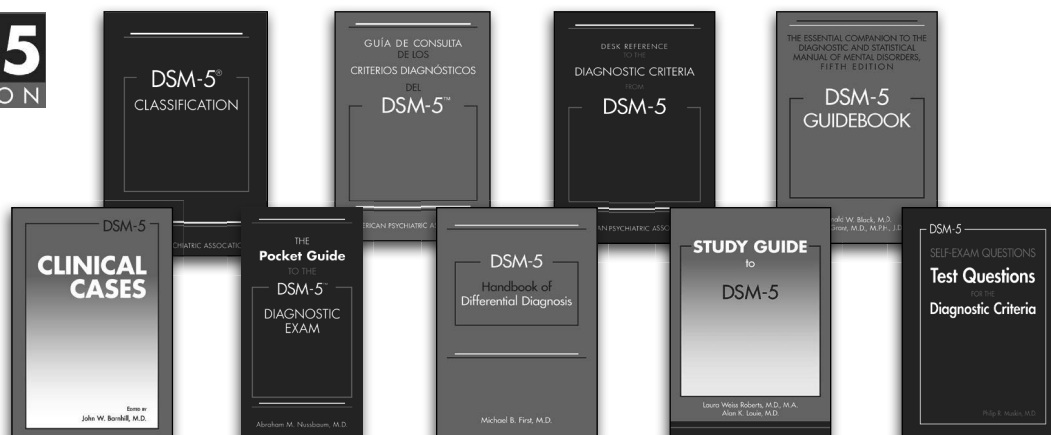

AMERICAN  
PSYCHIATRIC  
ASSOCIATION  
PUBLISHING

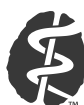

Order Online: [www.appi.org](http://www.appi.org)  
Phone: 703-907-7322  
Toll Free: 1-800-368-5777  
Email: [appi@psych.org](mailto:appi@psych.org)

20% Discount for American Psychiatric Association Members

25% Discount for APA Resident-Fellow Members

AH1842A

# PSYCHIATRYonline

Your Destination for Lifelong Learning in Psychiatry

The one-stop resource for information on diagnosis, treatment, guidelines, the latest research, and breaking news from the field.

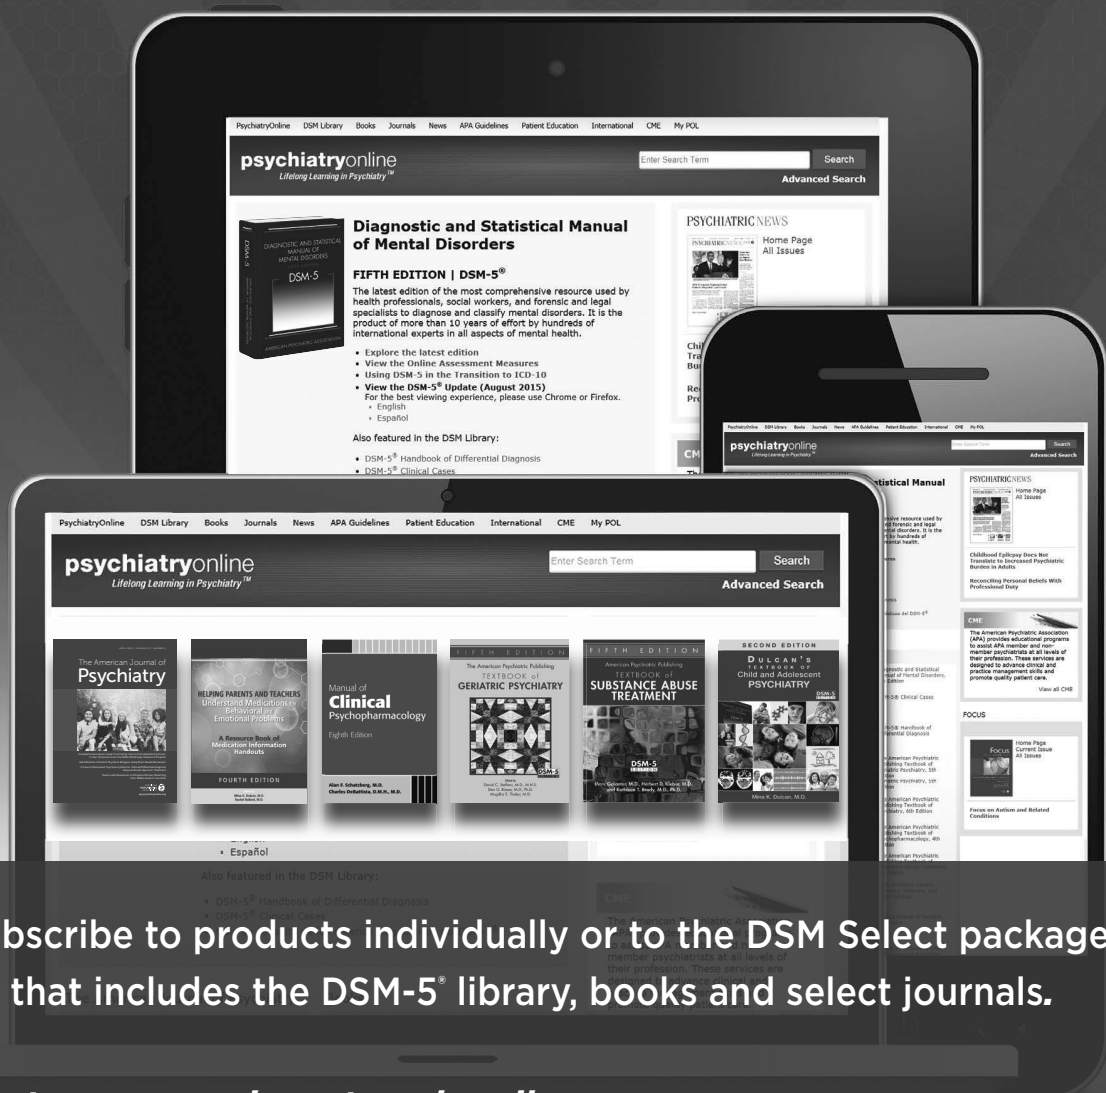

Subscribe to products individually or to the DSM Select package that includes the DSM-5® library, books and select journals.

**Go to [www.appi.org](http://www.appi.org) to subscribe.**

*Institutional subscription options are available. For more information contact: [institutions@psych.org](mailto:institutions@psych.org); 800-368-5777 ext. 3720*

AMERICAN  
PSYCHIATRIC  
ASSOCIATION  
PUBLISHING  
[www.appi.org](http://www.appi.org)

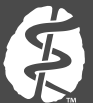

# The American Journal of Psychotherapy

[psychotherapy.psychiatryonline.org](http://psychotherapy.psychiatryonline.org)

Holly A. Swartz, M.D., Editor-in-Chief

*The American Journal of Psychotherapy* is a peer-reviewed, interdisciplinary journal published quarterly by the American Psychiatric Association. Begun in 1947 by the Association for the Advancement of Psychotherapy, *The American Journal of Psychotherapy* provides a forum for advancing the theory, science, and clinical practice of psychotherapy, publishing articles that expand the understanding of psychotherapies, especially in the domains of efficacy, process, education, and practice.

The journal publishes empirical papers on psychotherapy outcomes, process, measurement, and education. Maintaining a strong clinical focus, it welcomes case reports, review articles, and training tools that will guide and shape clinical practice.

*The American Journal of Psychotherapy* invites a broad range of perspectives from all psychotherapy disciplines, including but not limited to psychodynamic, interpersonal, cognitive- or dialectical-behavioral, existential, emotion-focused, problem-solving, mentalizing, mindfulness-based, and client-centered approaches.

*The American Journal of Psychotherapy* inclusively addresses topics across treatment modalities, age groups, genders, races and ethnicities, and diagnoses. The journal serves the international community by curating a vibrant, pluralistic, dialogue about psychotherapy that ultimately will inform clinical care.

**Subscribe Now!** .....

➤ **Visit [appi.org](http://appi.org) for pricing and more information!**

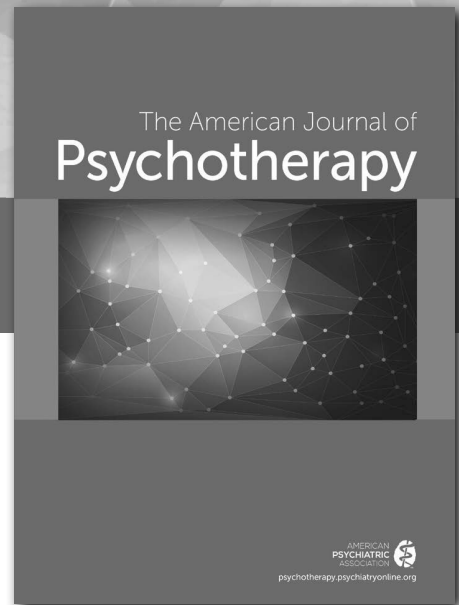

2018 • Vol. 73  
Frequency: Quarterly  
Online ISSN: 2575-6559  
[psychotherapy.psychiatryonline.org](http://psychotherapy.psychiatryonline.org)

AMERICAN  
PSYCHIATRIC  
ASSOCIATION  
PUBLISHING

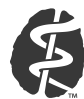

[appi.org](http://appi.org)  
1-800-368-5777  
[appi@psych.org](mailto:appi@psych.org)

[psychotherapy.psychiatryonline.org](http://psychotherapy.psychiatryonline.org)

AH2005A

# EDITOR'S CHOICE

## Psychiatric Services

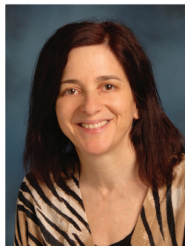

Lisa B. Dixon, M.D., M.P.H.

Collections curated by Lisa B. Dixon, M.D., M.P.H., and the Early-Career Psychiatrist Advisory Committee

Collections Editors: Carrie Cunningham, M.D., M.P.H., and Matthew L. Goldman, M.D., M.S.

### 2019 collections available from *Psychiatric Services*:

- Violence and mental illness
- Family members and caregivers
- Community-based mental health crisis services
- Mental health criminal justice diversion
- Early psychosis intervention
- Substance use disorders
- Mental health disparities by race and ethnicity
- Homelessness and mental health
- Perinatal psychiatry
- Peer support
- Recovery
- Integrated care

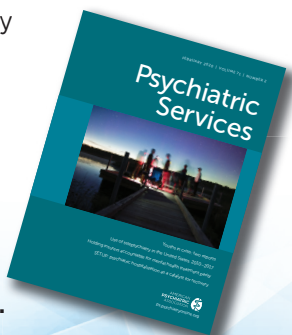

Sign up for Editor's Choice alert at <http://appi.org/etocs>.

Visit [ps.psychiatryonline.org/editorschoice](http://ps.psychiatryonline.org/editorschoice)

AMERICAN PSYCHIATRIC ASSOCIATION PUBLISHING

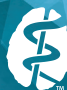

Follow @APAPubPsychSvcs

[appi.org](http://appi.org) • Email: [appi@psych.org](mailto:appi@psych.org) • Toll-Free: 1-800-368-5777

AH2001A

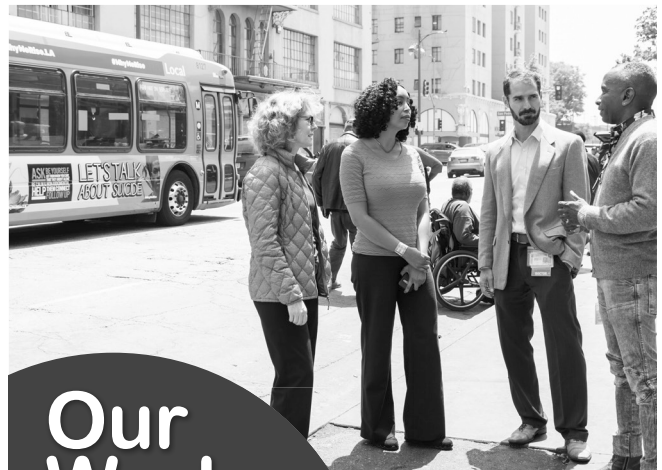

## Our Work Matters

Visit: [Psychiatristjobs.la](http://Psychiatristjobs.la)

Make a difference for those who need it the most.

- Join the largest and most dynamic mental health department in the country
- Multiple avenues for advancement and professional development
- Flexible work schedules
- Unparalleled work-life balance
- Highly competitive benefits
- Competitive salary with potential bonuses of up to **\$32,000 annually**
- Student loan repayment incentive of up to **\$250,000**
- Reimbursement of eligible relocation costs of up to **\$15,000**

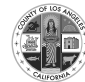

LOS ANGELES COUNTY DEPARTMENT OF MENTAL HEALTH  
hope. recovery. wellbeing.

## Textbook of Traumatic Brain Injury, Third Edition

Edited by Jonathan M. Silver, M.D., Thomas W. McAllister, M.D., and David B. Arciniegas, M.D.

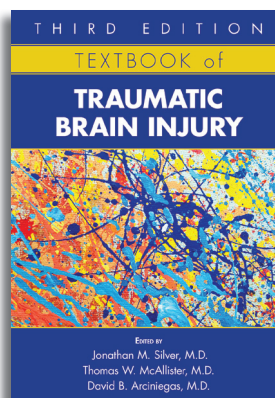

The *Textbook of Traumatic Brain Injury* is a must-read for all of those working in any of the multitude of disciplines that contribute to the care and rehabilitation of persons with brain injury. This new volume is also a potentially useful reference for policymakers in both the public and private sectors.

2019 • 985 pages • ISBN 978-1-61537-112-9 • Hardcover • \$195.00 • Item #37112  
2019 • 985 pages • ISBN 978-1-61537-247-8 • eBook • \$156.00 • Item #37247

AMERICAN PSYCHIATRIC ASSOCIATION PUBLISHING

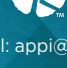

Follow @APAPubPsychSvcs

[www.appi.org](http://www.appi.org) • Email: [appi@psych.org](mailto:appi@psych.org) • Phone: 1-800-368-5777

AMERICAN PSYCHIATRIC ASSOCIATION PUBLISHING

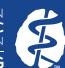

[www.appi.org](http://www.appi.org)  
Email: [appi@psych.org](mailto:appi@psych.org)  
Phone: 1-800-368-5777

AH1902A

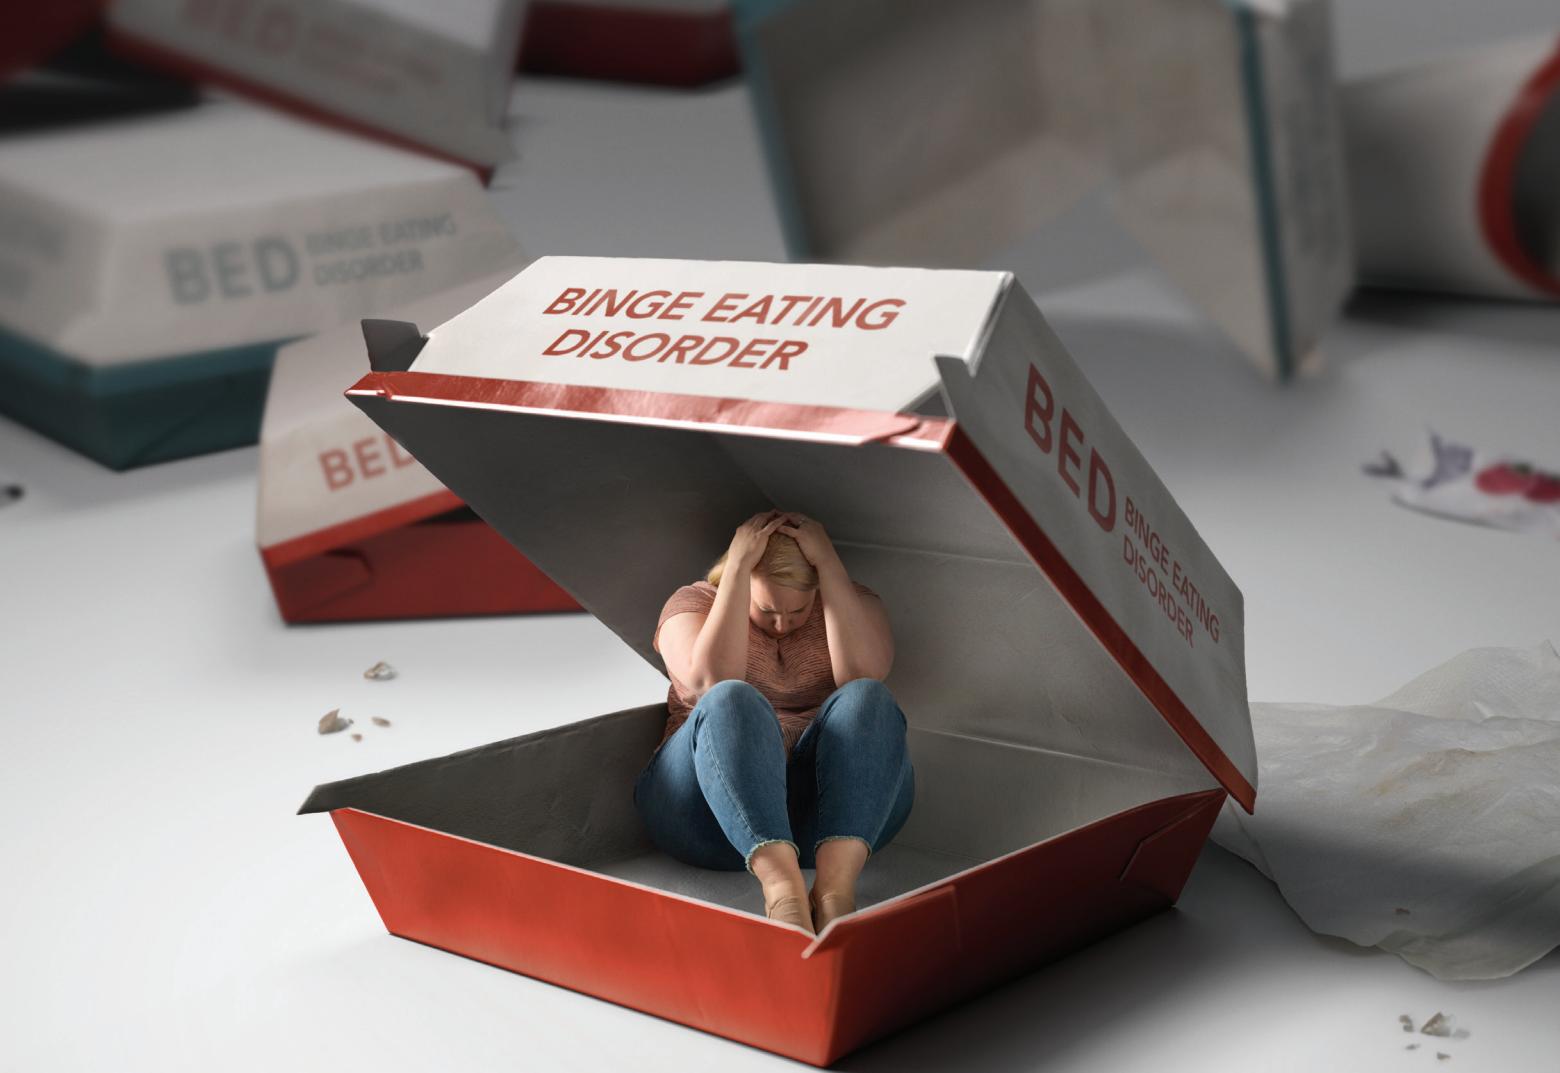

## BINGE EATING DISORDER (BED) CONSUMES HER

People with BED may feel trapped by compulsive eating behavior and obsessive thoughts around food<sup>1-3</sup>

BED is a neuropsychiatric condition that has been shown to significantly impact a patient's life, affecting both work and personal interactions.<sup>4,5</sup> But deep shame and guilt may cause people with BED to hide their symptoms<sup>4</sup>—even from their psychiatrists. Careful probing about BED symptoms may help patients feel more comfortable, so they don't shut down the conversation.<sup>6</sup>

► Visit [BurdenofBED.com](https://www.burdenofbed.com) to learn more and to download a Conversation Starter

Start the BED conversation

**References:** 1. Deal LS, Wirth RJ, Gasior M, et al. *Int J Eat Disord.* 2015;48(7):994-1004. 2. McElroy SL, Phillips KA, Keck PE, Jr. *J Clin Psychiatry.* 1994;55(10) suppl:33-51. 3. Beglin SJ, Fairburn CG. *Am J Psychiatry.* 1992;149(1):123-124. 4. American Psychiatric Association. Binge eating disorder. In: *Diagnostic and Statistical Manual of Mental Disorders, 5th ed.* Arlington, VA: American Psychiatric Association; 2013:350-353. 5. Rieger E, Wilfley DE, Stein RI, et al. *Int J Eat Disord.* 2005;37(3):234-240. 6. Kornstein SG, Keck PE Jr, Herman BK, et al. *Postgrad Med.* 2015;127(7):661-670.

SUNOVION and  are registered trademarks of Sumitomo Dainippon Pharma Co., Ltd. Sunovion Pharmaceuticals Inc. is a U.S. subsidiary of Sumitomo Dainippon Pharma Co., Ltd. © 2019 Sunovion Pharmaceuticals Inc. All rights reserved. 11/19 NPC-DAS-US-00085-19

 sunovion
